# Supplementary material for: Transcriptomic Evidence of Acquired Cannabis Hypersensitivity in Cannabinoid Hyperemesis Syndrome
Source: Research Square preprint supplement (doi:10.21203/rs.3.rs-8116530/v1), 2025-12-02
Supplement: Supplementary file 2 [file 9f3713156dcad8512145b78e.docx]

Supplementary Table 3. ECS Pathway
