# Supplementary material for: Transcriptomic Evidence of Acquired Cannabis Hypersensitivity in Cannabinoid Hyperemesis Syndrome
Source: Research Square preprint supplement (doi:10.21203/rs.3.rs-8116530/v1), 2025-12-02
Supplement: Supplementary file 3 [file e491ac3a7a2bccc7d5702d56.xlsx]

## Sheet: Sheet1
Supplementary Data 2. Complete list of Differentially Expressed Genes in CHS.
ENTREZID	SYMBOL	GENENAME	Base mean	log2(FC)	FOLD Change	P-value	P-adj
					UP
Adhesion/Barrier Function
28316	CDH20	cadherin 20	1.18639	-2.3049	4.94133	0.0263893	NA
1003	CDH5	cadherin 5	3.67757	-2.53573	5.79871	0.00232894	0.0210325
2862	MLNR	motilin receptor	1.20545	-2.23884	4.72016	0.0268585	NA
5819	NECTIN2	nectin cell adhesion molecule 2	74.2346	-2.18509	4.54757	2.46e-05	0.00115708
5413	SEPTIN5	septin 5	2.38966	-3.79875	13.9167	8.64e-05	0.00255543
7280	TUBB2A	tubulin beta 2A class IIa	484.546	-3.87853	14.708	0.000807	0.0107305
Proteolysis/Barrier Function
9509	ADAMTS2	ADAM metallopeptidase w thrombospondin motif 2	176.367	-7.10838	137.986	8.75e-27	1.48e-22
3249	HPN	hepsin (serine protease)	6.16032	-2.10169	4.29211	0.000450106	0.00726869
5654	HTRA1	HtrA serine peptidase 1 (high temp requirement)	16.6333	-2.64779	6.26707	4.76e-07	7.61e-05
4317	MMP8	matrix metallopeptidase 8	76.0864	-2.57876	5.97426	6.45e-05	0.00214789
4318	MMP9	matrix metallopeptidase 9	1745.64	-2.86596	7.2902	0.000155142	0.00373487
Inflammation
247	ALOX15B	arachidonate 15-lipoxygenase type B (15-LOX-2)	40.9351	-3.33089	10.0623	5.48e-08	1.43e-05
2352	FOLR3	folate receptor gamma	213.018	-2.16243	4.47668	5.84e-05	0.00200545
2852	GPER1	G protein-coupled estrogen receptor 1	29.6813	-2.56577	5.92072	1.2e-07	2.64e-05
3593	IL12B	interleukin 12B	1.79507	-2.43622	5.4122	0.00582882	NA
8809	IL18R1	interleukin 18 receptor 1	527.798	-2.20208	4.60141	1.76e-05	0.000924952
7850	IL1R2	interleukin 1 receptor type 2	1139.84	-2.12214	4.3534	8.4e-05	0.00254277
4057	LTF	lactotransferrin	277.483	-2.11592	4.33467	0.000691528	0.00966427
199675	MCEMP1	mast cell expressed membrane protein 1	334.279	-2.30817	4.95256	6.92e-07	0.000103675
54550	NECAB2	N-terminal EF-hand calcium binding protein 2	58.9272	-2.25615	4.77716	8.08e-05	0.00248211
Immune/antiviral/antibacterial
59272	ACE2	angiotensin converting enzyme 2	3.63315	-2.09529	4.27312	0.0194987	0.0798266
9332	CD163	CD163 molecule	1392.33	-2.23319	4.70173	4.39e-08	1.22e-05
57126	CD177	CD177 molecule	315.765	-3.42555	10.7447	0.00139187	0.0151877
1118	CHIT1	chitinase 1	16.1833	-2.02782	4.07788	0.0017374	0.0175336
1667	DEFA1	defensin alpha 1	1.20194	-3.25713	9.56077	0.0187284	NA
3106	HLA-B	major histocompatibility complex, class I, B	1299.18	-3.21537	9.28799	4.61e-06	0.000382178
3133	HLA-E	major histocompatibility complex, class I, E	14.5197	-2.17854	4.52696	0.000182025	0.00411845
3429	IFI27	interferon alpha inducible protein 27	2.00356	-3.55662	11.7666	0.000775864	0.0104794
	IgG Related	Immunoglobulin related (28 Transcripts)	variable		4-8
8460	TPST1	tyrosylprotein sulfotransferase 1	230.066	-2.84065	7.16342	1.09e-11	1.68e-08
Metabolism
383	ARG1	arginase 1	273.895	-2.89831	7.45552	1.48e-07	3.06e-05
771	CA12	carbonic anhydrase 12	4.04232	-2.27233	4.83102	0.00229036	0.0208156
1066	CES1	carboxylesterase 1	14.2228	-2.26118	4.79382	0.00343527	0.0267379
4128	MAOA	monoamine oxidase A (degrades serotonin 5-HT)	50.2315	-2.35593	5.11922	0.0105387	0.0542285
55301	OLAH	oleoyl-ACP hydrolase	18.8648	-4.5545	23.4986	9.3e-09	3.64e-06
144195	SLC2A14	solute carrier family 2 member 14	17.7861	-2.59239	6.03097	0.000169304	0.00392609
RBC/Blood group
	Hemoglobins	Hb alpha, Hb beta, Hb delta, Hb theta	variable		5-22	9.5e-05
388588	SMIM1	small integral membrane protein 1 (Vel blood group)	121.557	-2.33145	5.03312	0.00735639	0.0434705
53947	A4GALT	alpha 1,4-galactosyltransferase (P blood group)	8.83442	-2.19815	4.5889	0.0475745	0.143178
10661	KLF1	KLF transcription factor 1/globin switching	342.804	-2.40949	5.31287	8.97e-06	0.000600139
Unknown/Uncertain
85320	ABCC11	ATP binding cassette subfamily C member 11	3.9435	-4.14255	17.6617	0.00227915	0.0207528
79747	ADGB	androglobin	2.7629	-2.44399	5.44146	0.00549093	0.0362384
83543	AIF1L	allograft inflammatory factor 1 like	5.58828	-2.44422	5.44233	0.0221358	0.086419
26287	ANKRD2	ankyrin repeat domain 2	1.82833	-2.61306	6.11798	0.00485848	NA
195977	ANTXRL	ANTXR like	1.62562	-2.32933	5.02573	0.0144121	NA
389337	ARHGEF37	Rho guanine nucleotide exchange factor 37	57.1689	-2.32255	5.00216	7.77e-06	0.000538772
80816	ASXL3	ASXL transcriptional regulator 3	2.29813	-3.35589	10.2382	0.00131098	0.0145499
285696	BASP1-AS1	BASP1 antisense RNA 1	33.0074	-2.25224	4.7642	8.86e-05	0.00259042
168620	BHLHA15	basic helix-loop-helix family member a15 aka MIST1	10.4133	-2.51678	5.72305	0.000646418	0.00919326
100131378	C11orf91	chromosome 11 open reading frame 91	0.790851	-2.56279	5.9085	0.0422681	NA
79098	C1orf116	chromosome 1 open reading frame 116	84.6778	-2.58527	6.0013	5.98e-05	0.00203793
285382	C3orf70	chromosome 3 open reading frame 70	2.1622	-3.19075	9.13088	0.0014235	0.0153546
100130460	CAND1.11	uncharacterized LOC100130460	1.37371	-2.46462	5.51983	0.0371274	NA
79645	CLXN	calaxin	3.99976	-2.90344	7.48206	0.000417726	0.00690391
643827	CNTNAP3P2	CNTNAP3 pseudogene 2	18.8317	-2.38211	5.21299	0.00150938	0.0159355
1284	COL4A2	collagen type IV alpha 2 chain	4.31102	-3.25524	9.54825	9.19e-05	0.00262269
81035	COLEC12	collectin subfamily member 12	6.62649	-2.36435	5.14922	0.00026961	0.00517921
93979	CPA5	carboxypeptidase A5	9.4298	-2.21997	4.65885	0.00539282	0.0357494
1438	CSF2RA	colony stimulating factor 2 receptor subunit alpha	20.79	-3.42061	10.7079	6.46e-06	0.000483802
51596	CUTA	cutA divalent cation tolerance homolog	6.83254	-5.85065	57.7059	0.00893435	0.0492795
285154	CYP1B1-AS1	CYP1B1 antisense RNA 1	22.5803	-2.34663	5.08635	0.000255702	0.00501448
1558	CYP2C8	cytochrome P450 family 2 subfamily C member 8	1.23335	-2.29102	4.89403	0.0402372	NA
23500	DAAM2	dishevelled associated activator of morphogenesis 2	240.216	-2.98829	7.93532	0.00024834	0.00494858
161582	DNAAF4	dynein axonemal assembly factor 4	1.11316	-2.13099	4.38017	0.0474812	NA
1807	DPYS	dihydropyrimidinase	1.29948	-3.38071	10.4158	0.0186619	NA
51207	DUSP13B	dual specificity phosphatase 13B	2.27555	-2.47736	5.56876	0.00490347	0.0335434
8444	DYRK3	dual specificity tyrosine phosphorylation regulated kinase 3	118.645	-2.24961	4.75553	0.000406026	0.00675672
79746	ECHDC3	enoyl-CoA hydratase domain containing 3	48.5277	-2.03202	4.08977	0.00133288	0.0147272
151651	EFHB	EF-hand domain family member B	2.58257	-2.37625	5.19185	0.00676596	0.04116
54566	EPB41L4B	erythrocyte membrane protein band 4.1 like 4B	0.979014	-3.45258	10.9479	0.034702	NA
101926913	ERICH2-DT	ERICH2 divergent transcript	1.12984	-2.63926	6.23011	0.0494105	NA
100132948	FAM27C	family with sequence similarity 27 member C	0.708887	-2.96423	7.80406	0.0197532	NA
100131997	FAM27E3	family with sequence similarity 27 member E3	1.63665	-3.26457	9.61019	0.0462883	NA
54097	FAM3B	FAM3 metabolism regulating signaling molecule B	4.28148	-3.18538	9.09693	0.00254174	0.0222332
84985	FAM83A	family with sequence similarity 83 member A	26.0718	-2.0619	4.17536	0.0444155	0.136646
2191	FAP	fibroblast activation protein alpha	1.02695	-3.04206	8.23664	0.0108648	NA
157574	FBXO16	F-box protein 16	0.89521	-2.8246	7.08416	0.0286104	NA
2258	FGF13	fibroblast growth factor 13	13.0848	-2.07478	4.2128	7.7e-06	0.000538445
2322	FLT3	fms related receptor tyrosine kinase 3	224.703	-2.53331	5.78898	1.92e-11	2.32e-08
94234	FOXQ1	forkhead box Q1	1.82494	-3.03834	8.21545	0.0141135	NA
79623	GALNT14	polypeptide N-acetylgalactosaminyltransferase 14	45.7315	-2.19658	4.58392	7.02e-09	3.21e-06
2731	GLDC	glycine decarboxylase	25.3978	-2.07395	4.21037	0.00323254	0.0257326
342035	GLDN	gliomedin	1.19494	-2.21367	4.63855	0.0261306	NA
2887	GRB10	growth factor receptor bound protein 10	215.977	-2.4817	5.58555	1.27e-08	4.51e-06
3039	HBA1	hemoglobin subunit alpha 1	23.0332	-2.90691	7.50012	0.000449187	0.00726373
3040	HBA2	hemoglobin subunit alpha 2	49.7363	-2.41312	5.32624	2.7e-06	0.000270548
3043	HBB	hemoglobin subunit beta	656.437	-2.32651	5.01589	9.5e-05	0.00267968
3045	HBD	hemoglobin subunit delta	73.1993	-4.48512	22.3953	7.63e-06	0.000535497
3049	HBQ1	hemoglobin subunit theta 1	98.9598	-2.43021	5.38972	0.000262695	0.00511965
10866	HCP5	HLA complex P5	0.995035	-2.40046	5.2797	0.0275438	NA
101927278	HPS1-AS1	HPS1 antisense RNA 1	2.68883	-2.1781	4.52558	0.0192013	0.0791242
8739	HRK	harakiri, BCL2 interacting protein	14.0152	-2.61202	6.1136	1.25e-07	2.71e-05
3485	IGFBP2	insulin like growth factor binding protein 2	6.3223	-2.2816	4.86216	0.0089329	0.0492795
3493	IGHA1	immunoglobulin heavy constant alpha 1	38.4903	-2.51688	5.72344	2.13e-07	3.91e-05
3494	IGHA2	immunoglobulin heavy constant alpha 2 (A2m marker)	331.116	-2.70179	6.5061	0.0304064	0.107163
3503	IGHG4	immunoglobulin heavy constant gamma 4 (G4m marker)	1.99513	-2.79047	6.91854	0.0175569	0.0751248
28442	IGHV3-23	immunoglobulin heavy variable 3-23	1.99939	-2.6272	6.17827	0.00576215	0.0372761
28933	IGKV1-33	immunoglobulin kappa variable 1-33	29.981	-2.08946	4.25588	0.0323066	0.111674
28943	IGKV1-6	immunoglobulin kappa variable 1-6	20.479	-2.40499	5.29633	0.00119423	0.0137866
28941	IGKV1-9	immunoglobulin kappa variable 1-9	45.99	-2.26399	4.80318	2e-05	0.00100644
28901	IGKV1D-16	immunoglobulin kappa variable 1D-16	2.30823	-2.11044	4.31822	0.0232179	0.089264
28893	IGKV1D-39	immunoglobulin kappa variable 1D-39	12.6653	-2.37717	5.19517	0.000501103	0.00776618
28921	IGKV2-28	immunoglobulin kappa variable 2-28	6.22978	-2.0671	4.19045	0.0267994	0.0985094
28920	IGKV2-29	immunoglobulin kappa variable 2-29	17.6403	-2.22427	4.67274	0.00470471	0.0326504
28882	IGKV2D-29	immunoglobulin kappa variable 2D-29	15.4861	-2.81222	7.02366	0.000209545	0.00446901
28881	IGKV2D-30	immunoglobulin kappa variable 2D-30	7.37375	-3.0222	8.12405	0.00231795	0.0209701
28912	IGKV3-20	immunoglobulin kappa variable 3-20	219.366	-2.00971	4.02702	2.37e-05	0.00113023
28875	IGKV3D-15	immunoglobulin kappa variable 3D-15	11.2889	-2.93964	7.67222	0.000397416	0.0066924
28874	IGKV3D-20	immunoglobulin kappa variable 3D-20	10.653	-3.1353	8.78658	0.000158328	0.00376869
28870	IGKV6D-21	immunoglobulin kappa variable 6D-21 (non-functional)	3.62204	-2.80482	6.9877	0.00660838	0.0406839
3538	IGLC2	immunoglobulin lambda constant 2	582.621	-2.00708	4.01968	2.16e-05	0.00105161
3539	IGLC3	immunoglobulin lambda constant 3 (Kern-Oz+ marker)	464.842	-2.29569	4.90988	8.3e-05	0.00252418
3541	IGLC5	immunoglobulin lambda constant 5 (pseudogene)	12.4143	-2.06131	4.17366	0.00382479	0.0285438
28809	IGLV3-1	immunoglobulin lambda variable 3-1	78.2378	-2.01617	4.04508	0.000118643	0.00311788
28796	IGLV3-21	immunoglobulin lambda variable 3-21	149.796	-3.10669	8.61406	4.83e-05	0.00180384
28793	IGLV3-25	immunoglobulin lambda variable 3-25	61.3583	-2.31187	4.96527	1.79e-05	0.000929572
28791	IGLV3-27	immunoglobulin lambda variable 3-27	7.269	-2.23446	4.70588	0.000278407	0.00531201
28786	IGLV4-3	immunoglobulin lambda variable 4-3	1.21023	-2.28845	4.8853	0.0216263	NA
28785	IGLV4-60	immunoglobulin lambda variable 4-60	8.93099	-2.03659	4.10274	0.00302764	0.0248459
28773	IGLV9-49	immunoglobulin lambda variable 9-49	10.6052	-2.18147	4.53615	9.3e-05	0.00263523
28763	IGLVI-70	immunoglobulin lambda variable (I)-70 (pseudogene)	18.9862	-4.2216	18.6565	5.27e-06	0.000418503
3625	INHBB	inhibin subunit beta B	24.2282	-2.70762	6.53242	3.08e-06	0.000294102
387755	INSC	INSC spindle orientation adaptor protein	9.95731	-2.05198	4.14674	0.00139967	0.0152205
3753	KCNE1	potassium voltage-gated channel subfamily E regulatory subunit 1	43.1175	-2.39789	5.27033	1.4e-06	0.000172828
26153	KIF26A	kinesin family member 26A	8.12948	-2.49115	5.62226	1.07e-05	0.000673904
136259	KLF14	KLF transcription factor 14	2.10946	-3.62588	12.3452	0.00292971	0.0244368
3860	KRT13	keratin 13	2.23766	-2.18136	4.5358	0.0152456	0.0690437
144501	KRT80	keratin 80	1.29971	-2.35	5.09823	0.0196459	NA
114823	LENG8	leukocyte receptor cluster member 8	6.50026	-2.64273	6.24514	0.0143498	0.0664581
104326054	LINC00399	long intergenic non-protein coding RNA 399	4.03143	-2.81076	7.01653	0.00686076	0.0414092
284185	LINC00482	long intergenic non-protein coding RNA 482	27.1234	-2.05462	4.15435	9.9e-07	0.000133104
401109	LINC00885	long intergenic non-protein coding RNA 885	8.3838	-2.31784	4.98586	0.00640987	0.0400118
101927532	LINC01736	long intergenic non-protein coding RNA 1736	4.26532	-3.26154	9.59006	0.000129295	0.00331166
101929733	LINC01954	long intergenic non-protein coding RNA 1954	1.90719	-2.99124	7.95155	0.034446	0.116383
101926892	LINC03020	long intergenic non-protein coding RNA 3020	2.80867	-2.53139	5.78128	0.0111439	0.0562787
221416	LINC03040	long intergenic non-protein coding RNA 3040	1.63949	-2.2107	4.62901	0.0428857	NA
101929154	LOC101929154	uncharacterized LOC101929154	1.09515	-2.65806	6.31183	0.0125905	NA
102723475	LOC102723475	potassium voltage-gated channel subfamily E regulatory subunit 1B	5.08958	-3.4816	11.1703	0.00222365	0.0205087
105373989	LOC105373989	putative cuticle collagen 91	3.76747	-2.76225	6.78452	0.000401985	0.00673293
105378577	LOC105378577	uncharacterized LOC105378577	5.35636	-3.53806	11.6162	0.00553456	0.0364321
285847	LOC285847	uncharacterized LOC285847	12.8702	-2.26739	4.81452	0.00050598	0.00781315
4014	LORICRIN	loricrin cornified envelope precursor protein	1.18772	-3.7211	13.1875	0.0439421	NA
4023	LPL	lipoprotein lipase	39.6439	-3.27735	9.69574	1.02e-13	2.87e-10
55897	MESP1	mesoderm posterior bHLH transcription factor 1	1.15018	-2.76354	6.79058	0.00967735	NA
4233	MET	MET proto-oncogene, receptor tyrosine kinase	2.63739	-2.03404	4.09551	0.0173245	0.0745276
157627	MIR124-1HG	MIR124-1 host gene	1.40577	-3.55483	11.752	0.0470584	NA
407013	MIR24-2	microRNA 24-2	4.35591	-2.20237	4.60234	0.00238566	0.021385
100506457	MIR3681HG	MIR3681 host gene	2.27059	-3.79666	13.8966	0.0238465	0.0906395
100616157	MIR4772	microRNA 4772	8.08587	-2.31281	4.9685	0.00986736	0.0523332
102465472	MIR6787	microRNA 6787	1.50003	-2.17376	4.51199	0.0230089	NA
400058	MKRN9P	makorin ring finger protein 9, pseudogene	12.899	-2.11828	4.34176	0.00202459	0.0191848
105375110	NA	NA	58.4718	-2.08383	4.23932	0.000737497	0.0101392
101928632	NA	NA	1.48687	-3.14725	8.85963	0.003485	NA
338809	NA	C12orf74 chromosome 12 open reading frame 74	2.18455	-2.57025	5.93913	0.00455945	0.032005
103504728	NA	microRNA 3687-2	1.29001	-3.39221	10.4992	0.00761823	NA
387638	NA	chromosome 10 open reading frame 113	4.15453	-2.73249	6.646	0.0212587	0.0845154
105374156	NA	protein FAM188B2-like	0.807293	-3.15541	8.90993	0.022231	NA
256302	NATD1	N-acetyltransferase domain containing 1	1746.27	-2.25469	4.77231	9.11e-08	2.06e-05
10529	NEBL	nebulette	111.727	-3.3043	9.87856	0.00139459	0.0152076
9722	NOS1AP	nitric oxide synthase 1 adaptor protein	5.98268	-2.11284	4.32543	0.00210276	0.0197158
4905	NSF	N-ethylmaleimide sensitive factor, vesicle fusing ATPase	7.13233	-2.87676	7.34499	0.00212054	0.0198342
26471	NUPR1	nuclear protein 1, transcriptional regulator	1.90106	-3.4863	11.2068	0.0155055	0.0698842
255725	OR52B2	olfactory receptor family 52 subfamily B member 2	1.59702	-2.66056	6.32278	0.0252114	NA
5004	ORM1	orosomucoid 1	37.142	-2.21586	4.64559	0.000582674	0.00857493
55229	PANK4	pantothenate kinase 4 (inactive)	5.88359	-2.23041	4.69267	0.0179525	0.0759949
5089	PBX2	PBX homeobox 2	28.8676	-4.14019	17.6329	6.05e-09	2.84e-06
728606	PCAT18	prostate cancer associated transcript 18	0.79928	-2.64017	6.23406	0.0263294	NA
27344	PCSK1N	proprotein convertase subtilisin/kexin type 1 inhibitor	66.8926	-2.08871	4.25368	0.00195486	0.0187233
5222	PGA5	pepsinogen A5	1.224	-2.82126	7.06781	0.0323831	NA
57115	PGLYRP4	peptidoglycan recognition protein 4	0.789647	-2.56883	5.93328	0.042237	NA
57110	PLAAT1	phospholipase A and acyltransferase 1	6.59688	-2.44964	5.46281	7.59e-05	0.00238762
54979	PLAAT2	phospholipase A and acyltransferase 2	3.92295	-2.90228	7.47608	0.000787883	0.0105659
5468	PPARG	peroxisome proliferator activated receptor gamma	5.87371	-2.39242	5.25036	0.00100421	0.0123243
5792	PTPRF	protein tyrosine phosphatase receptor type F	70.3557	-2.16094	4.47207	0.000282212	0.00534731
5649	RELN	reelin	13.4368	-2.11924	4.34465	0.00788418	0.0456021
56729	RETN	resistin	80.5692	-3.82231	14.1459	2.52e-06	0.000253574
6029	RN7SL1	RNA component of signal recognition particle 7SL1 (immunostimulatory)	13023.4	-2.75317	6.74198	1.46e-08	4.74e-06
378706	RN7SL2	RNA component of signal recognition particle 7SL2	9773.65	-2.15402	4.45066	1.4e-08	4.65e-06
6035	RNASE1	ribonuclease A family member 1, pancreatic	61.7403	-3.47304	11.1043	2.39e-06	0.000245269
4549	RNR1	s-rRNA	72.4112	-3.12123	8.70132	8.81e-06	0.000593942
26834	RNU4-2	RNA, U4 small nuclear 2	18.0222	-2.07538	4.21456	2.45e-05	0.00115635
26827	RNU6-1	RNA, U6 small nuclear 1	1.12445	-3.12093	8.69947	0.00561261	NA
6085	RNY3	RNA, Ro60-associated Y3	3.72085	-3.44889	10.9199	0.00019925	0.00434213
113157	RPLP0P2	ribosomal protein lateral stalk subunit P0 pseudogene 2	3.53537	-2.57922	5.97615	0.00438401	0.0311482
27156	RSPH14	radial spoke head 14 homolog	13.9986	-2.11639	4.33608	0.000424832	0.00700765
84870	RSPO3	R-spondin 3	0.936125	-2.91245	7.52895	0.046026	NA
10900	RUNDC3A	RUN domain containing 3A	755.77	-2.07017	4.19935	0.000710035	0.00986587
101926996	RUNDC3A-AS1	RUNDC3A antisense RNA 1	31.8066	-2.16624	4.48853	0.00098737	0.0121782
161394	SAMD15	sterile alpha motif domain containing 15	7.91373	-2.04787	4.13494	0.000127105	0.00327416
677770	SCARNA22	small Cajal body-specific RNA 22	4.29877	-2.74764	6.7162	0.000387743	0.00660734
6382	SDC1	syndecan 1	8.50122	-3.01648	8.09191	0.000395496	0.00668002
10806	SDCCAG8	SHH signaling and ciliogenesis regulator SDCCAG8	3.99184	-3.76774	13.6208	0.000170493	0.00394724
5273	SERPINB10	serpin family B member 10	18.5698	-2.34072	5.06555	6.45e-06	0.000483802
6422	SFRP1	secreted frizzled related protein 1	1.97569	-2.70522	6.52158	0.0191753	0.0790746
84251	SGIP1	SH3GL interacting endocytic adaptor 1	28.9688	-2.09711	4.27851	0.00244788	0.0217356
114132	SIGLEC11	sialic acid binding Ig like lectin 11	21.1531	-2.41954	5.34999	9.28e-07	0.000129487
89858	SIGLEC12	sialic acid binding Ig like lectin 12	7.68345	-2.22233	4.66647	0.014612	0.0671007
58516	SINHCAF	SIN3-HDAC complex associated factor	9.4568	-3.97098	15.6814	0.0183411	0.0771193
6536	SLC6A9	solute carrier family 6 member 9 GLYT1 glycine transporter	209.675	-2.08395	4.23967	0.000460235	0.00738296
641364	SLC7A11-AS1	SLC7A11 antisense RNA 1	1.05989	-2.5731	5.95086	0.0456054	NA
6578	SLCO2A1	solute carrier organic anion transporter family member 2A1	1.1765	-3.26016	9.58088	0.0268762	NA
692108	SNORD67	small nucleolar RNA, C/D box 67	1.60159	-2.16139	4.47347	0.0437632	NA
57522	SRGAP1	SLIT-ROBO Rho GTPase activating protein 1	34.5256	-2.34649	5.08584	9.47e-09	3.64e-06
29906	ST8SIA5	ST8 alpha-N-acetyl-neuraminide alpha-2,8-sialyltransferase 5	2.694	-4.04049	16.4554	0.000518447	0.00796206
6769	STAC	SH3 and cysteine rich domain	1.20901	-2.29944	4.92268	0.0363403	NA
6891	TAP2	transporter 2, ATP binding cassette subfamily B member	2.09858	-3.65221	12.5726	0.0135407	0.0640299
6948	TCN2	transcobalamin 2	94.9514	-2.14845	4.4335	1.37e-09	8.94e-07
7010	TEK	TEK receptor tyrosine kinase, aka Tie-2 angiopoetin receptor	15.7922	-2.36997	5.16931	0.00378079	0.0282999
9911	TMCC2	transmembrane and coiled-coil domain family 2	2057.74	-3.12685	8.73523	6.03e-05	0.00204893
338773	TMEM119	transmembrane protein 119	23.827	-2.90018	7.46517	8.74e-19	7.4e-15
57413	TMIGD3	transmembrane and immunoglobulin domain containing 3	16.6263	-3.25915	9.57416	4.51e-11	4.77e-08
196410	TMT1B	thiol methyltransferase 1B	4.61986	-3.36185	10.2806	0.000164838	0.00388005
347733	TUBB2B	tubulin beta 2B class IIb	1.96442	-4.00406	16.0451	0.00501456	0.0340651
134111	UBE2QL1	ubiquitin conjugating enzyme E2 Q family like 1	0.778995	-3.16285	8.95597	0.00687744	NA
7345	UCHL1	ubiquitin C-terminal hydrolase L1	0.962329	-3.48113	11.1667	0.0173557	NA
8876	VNN1	vanin 1	681.686	-2.26852	4.81827	1.87e-06	0.000211221
11326	VSIG4	V-set and immunoglobulin domain containing 4	290.793	-2.34283	5.07296	9.06e-07	0.000128593
128434	VSTM2L	V-set and transmembrane domain containing 2 like	2.15225	-2.41421	5.33027	0.00555827	0.0364747
58189	WFDC1	WAP four-disulfide core domain 1	1.51949	-3.62245	12.3159	0.00517407	NA
140686	WFDC3	WAP four-disulfide core domain 3	1.48549	-2.58863	6.01529	0.013042	NA
91746	YTHDC1	YTH N6-methyladenosine RNA binding protein C1	20.0716	-5.29165	39.1692	0.000535612	0.00812978
57507	ZNF608	zinc finger protein 608	166.134	-2.30173	4.93049	1.96e-09	1.1e-06
ENTREZID	SYMBOL	GENENAME	Base mean	log2(FC)	FOLD Change	P-value	P-adj
					DOWN
Adhesion/Barrier Function
55966	AJAP1	adherens junctions associated protein 1	4.79843	2.74478	6.70286	0.000921108	0.0116683
348110	ARPIN	actin related protein 2/3 complex inhibitor	112.251	2.12886	4.37371	1.68e-11	2.32e-08
1969	EPHA2	EPH receptor A2	5.96322	2.14157	4.41241	0.000207638	0.00445946
55742	PARVA	parvin alpha	1.51995	3.00749	8.04161	0.00639366	NA
54510	PCDH18	protocadherin 18	0.847512	2.60735	6.09382	0.0418043	NA
56099	PCDHGB7	protocadherin gamma subfamily B, 7	1.20865	2.60494	6.08368	0.016766	NA
Proteolytic/Barrier Function
2	A2M	alpha-2-macroglobulin	322.468	2.04224	4.11883	7.36e-06	0.000523359
144568	A2ML1	alpha-2-macroglobulin like 1	1.21154	2.0874	4.2498	0.0414262	NA
253128	LINC00612	LINC RNA 612 A2M-AS1	53.3097	2.02343	4.06549	3.92e-05	0.00156905
5858	PZP	PZP alpha-2-macroglobulin like	183.682	2.26866	4.81877	1.65e-07	3.29e-05
7078	TIMP3	TIMP metallopeptidase inhibitor 3	4.78474	2.19079	4.56555	0.00304042	0.024882
Inflammation
246	ALOX15	arachidonate 15-lipoxygenase (retic isoform)	64.0765	3.44074	10.8584	0.000743696	0.0101829
79370	BCL2L14	BCL2 like 14	0.907861	2.71109	6.54817	0.0157733	NA
3576	CXCL8/IL8	C-X-C motif chemokine ligand 8/Interleukin 8	46.9504	2.29359	4.90275	8.71e-05	0.00255839
5169	ENPP3	ectonucleotide pyrophosphatase/phosphodiesterase 3	13.9842	2.22932	4.68912	9.38e-09	3.64e-06
100874362	HOXB-AS1	HOXB cluster antisense RNA 1	6.9681	2.34679	5.08693	3.72e-05	0.00151895
146433	IL34	interleukin 34	1.11869	3.522	11.4876	0.000618849	NA
3565	IL4	interleukin 4	1.92841	2.54211	5.8244	0.0100406	0.0529202
137797	LYPD2	LY6/PLAUR domain containing 2	6.82185	2.96565	7.81177	0.000212393	0.00450444
2206	MS4A2	membrane spanning 4-domains A2/FCER1B	41.59	2.39752	5.26898	4.84e-08	1.3e-05
286133	SCARA5	scavenger receptor class A member 5	2.35702	2.6862	6.43616	0.00992243	0.0524609
27181	SIGLEC8	sialic acid binding Ig like lectin 8	18.2552	4.02676	16.2995	2.15e-06	0.000233404
	TCRs	T cell receptor constant and joining (8)
10720	UGT2B11	UDP glucuronosyltransferase family 2 member B11	39.7434	3.22235	9.33307	4e-12	7.52e-09
Neurotransmission
57596	BEGAIN	brain enriched guanylate kinase associated	12.6607	2.12371	4.35813	0.00093409	0.0117886
1621	DBH	dopamine beta-hydroxylase	4.87508	2.30282	4.93422	7e-05	0.00226898
138948	DBH-AS1	DBH antisense RNA 1	6.57022	2.04576	4.12891	0.000209082	0.00446901
54207	KCNK10	potassium two pore domain channel subfamily K member 10	2.90381	2.22394	4.67168	0.0014095	0.0152595
4888	NPY6R	neuropeptide Y receptor Y6 (pseudogene)	5.31757	2.26488	4.80614	5.93e-05	0.00203046
22854	NTNG1	netrin G1	1.73699	2.76394	6.79247	0.00470834	NA
22986	SORCS3	sortilin related VPS10 domain containing receptor 3	6.97046	2.34929	5.09575	0.000897071	0.0114928
Signaling
59283	CACNG8	calcium voltage-gated channel auxiliary subunit gamma 8	13.6454	3.06704	8.38054	4.4e-11	4.77e-08
59285	CACNG6	calcium voltage-gated channel auxiliary subunit gamma 6	6.71967	2.13067	4.37922	0.000193529	0.00427026
2847	MCHR1	melanin concentrating hormone receptor 1	4.54711	2.31143	4.96375	0.000273314	0.00522662
2263	FGFR2	fibroblast growth factor receptor 2	16.9321	2.33088	5.03111	0.000475168	0.00753678
200150	PLD5	phospholipase D family member 5	1.30126	3.28691	9.76023	0.00206987	NA
Metabolism
9420	CYP7B1	cytochrome P450 family 7 subfamily B member 1	3.34254	2.74864	6.72085	0.000198831	0.00434195
54490	UGT2B28	UDP glucuronosyltransferase family 2 member B28	1.78655	3.27982	9.71238	0.00228082	NA
1757	SARDH	sarcosine dehydrogenase	25.3035	2.08851	4.2531	9e-07	0.000128593
DNA/RNA Regulation
7307	U2AF1	U2 small nuclear RNA auxiliary factor 1	11.355	2.62509	6.16924	0.000220623	0.00459831
105	ADARB2	adenosine deaminase RNA specific B2 (inactive)	9.0401	3.55686	11.7685	0.00141879	0.0153236
161931	ADAD2	adenosine deaminase domain containing 2	1.13201	2.54001	5.81591	0.0137952	NA
693228	MIR643	microRNA 643	0.852348	3.16381	8.96192	0.0137985	NA
282996	RBM20	RNA binding motif protein 20	2.25734	2.34279	5.07282	0.0149088	0.0680035
8999	CDKL2	cyclin dependent kinase like 2	2.01948	2.13102	4.38026	0.0109766	0.0556859
79173	BRME1	break repair meiotic recombinase recruitment factor 1	3.56198	2.03301	4.09259	0.00418091	0.0301464
Unknown/Uncertain
3	A2MP1	alpha-2-macroglobulin pseudogene 1	24.5003	2.4571	5.49111	1.59e-06	0.000185285
144571	A2M-AS1	A2M antisense RNA 1	70.8015	2.00222	4.00616	1.36e-05	0.000777265
10777	ARPP21	cAMP regulated phosphoprotein 21	1.71803	2.67685	6.39458	0.0244199	NA
326342	ADGRE4P	adhesion G protein-coupled receptor E4, pseudogene	69.3648	2.88061	7.3646	5.86e-16	3.3e-12
66037	BOLL	boule homolog, RNA binding protein	2.56836	2.37977	5.20453	0.0253607	0.0946009
136288	C7orf57	chromosome 7 open reading frame 57	0.922948	3.25136	9.52266	0.0173433	NA
100507056	CCAT1	colon cancer associated transcript 1	2.43626	2.19743	4.58662	0.0120428	0.0593191
643669	CCER2	coiled-coil glutamate rich protein 2	3.2557	2.0263	4.0736	0.00416949	0.0301043
1490	CCN2	cellular communication network factor 2	2.35359	2.2103	4.62773	0.0204924	0.0823588
8999	CDKL2	cyclin dependent kinase like 2	2.01948	2.13102	4.38026	0.0109766	0.0556859
284040	CDRT4	CMT1A duplicated region transcript 4	1.50981	2.08585	4.24526	0.0397553	NA
102724279	CLEC4OP	C-type lectin domain family 4 member O, pseudogene	3.74161	3.53306	11.576	0.000232118	0.00476743
57393	CLTRN	collectrin, amino acid transport regulator	1.21947	3.15043	8.87922	0.00600871	NA
100874063	CLYBL-AS2	CLYBL antisense RNA 2	1.84795	2.02776	4.07773	0.0158627	0.0708527
101927437	CLYBL-AS3	CLYBL antisense RNA 3	0.78191	2.49197	5.62545	0.0306049	NA
100873975	CNTN4-AS1	CNTN4 antisense RNA 1	1.20059	3.15376	8.8997	0.00165216	NA
1305	COL13A1	collagen type XIII alpha 1 chain	4.21404	2.17123	4.50406	0.0136389	0.0642787
1297	COL9A1	collagen type IX alpha 1 chain	1.39642	3.3679	10.3238	0.00685956	NA
728763	CROCC2	ciliary rootlet coiled-coil, rootletin family member 2	28.8639	2.01139	4.03171	5.82e-09	2.84e-06
100874074	DLEU7-AS1	DLEU7 antisense RNA 1	3.66457	2.05093	4.14372	0.00170751	0.0173456
100874096	DOCK9-AS1	DOCK9 antisense RNA 1	1.70464	2.28796	4.88366	0.0120958	NA
100874018	EPN2-AS1	EPN2 antisense RNA 1	1.69835	2.17536	4.51699	0.019614	NA
340286	FAM183BP	acyloxyacyl hydrolase (neutrophil)	0.75091	2.40186	5.28484	0.0385952	NA
100132923	FAM66D	family with sequence similarity 66 member D	2.6283	2.39801	5.27077	0.00133291	0.0147272
166752	FREM3	FRAS1 related extracellular matrix 3	1.26786	2.1276	4.36991	0.0479639	NA
2737	GLI3	GLI family zinc finger 3	4.78212	2.5239	5.75134	0.00190623	0.0184139
79977	GRHL2	grainyhead like transcription factor 2	1.59858	2.22843	4.68625	0.032321	NA
2902	GRIN1	glutamate ionotropic receptor NMDA type subunit 1	0.901698	3.22569	9.35472	0.0251373	NA
2974	GUCY1B2	guanylate cyclase 1 soluble subunit beta 2 (pseudogene)	2.60144	2.70024	6.4991	0.0123432	0.060114
64399	HHIP	hedgehog interacting protein	0.695622	2.33072	5.03058	0.0459562	NA
51171	HSD17B14	hydroxysteroid 17-beta dehydrogenase 14	1.25419	2.72959	6.63269	0.0128306	NA
3507	IGHM	immunoglobulin heavy constant mu	102.387	2.36904	5.16595	0.0298303	0.105639
28801	IGLV3-13	immunoglobulin lambda variable 3-13 (pseudogene)	7.72699	2.99236	7.95776	0.00956934	0.0514622
153469	JAKMIP2-AS1	JAKMIP2 antisense RNA 1	1.06302	3.46009	11.0051	0.0186139	NA
89822	KCNK17	potassium two pore domain channel subfamily K member 17	2.34008	2.13895	4.4044	0.0208985	0.0834298
100128531	KIAA1671-AS1	KIAA1671 antisense RNA 1	1.73144	2.73265	6.64678	0.0283258	NA
127707	KLHDC7A	kelch domain containing 7A	1.35278	2.8564	7.24204	0.0371843	NA
646113	LINC00643	long intergenic non-protein coding RNA 643	1.52413	3.01451	8.08087	0.022847	NA
100507267	LINC01187	long intergenic non-protein coding RNA 1187	1.79816	2.74481	6.70302	0.00325785	NA
79015	LINC01260	long intergenic non-protein coding RNA 1260	7.98469	2.0726	4.20643	1.24e-05	0.000726649
101929651	LINC01398	long intergenic non-protein coding RNA 1398	0.987051	2.81017	7.01369	0.0264683	NA
101927921	LINC01478	long intergenic non-protein coding RNA 1478	0.712289	2.87655	7.34392	0.0434603	NA
101929694	LINC02042	long intergenic non-protein coding RNA 2042	1.0821	3.50692	11.3681	0.0165003	NA
101930452	LINC02367	long intergenic non-protein coding RNA 2367	0.627731	2.68884	6.44796	0.0310191	NA
101927901	LINC02421	long intergenic non-protein coding RNA 2421	2.89337	2.19034	4.56413	0.00413731	0.0299614
101928663	LOC101928663	uncharacterized LOC101928663	1.62359	3.08834	8.50518	0.0085632	NA
105371910	LOC105371910	uncharacterized LOC105371910	2.45451	1.99751	3.9931	0.0194427	0.0796922
442497	LOC442497	uncharacterized LOC442497	0.564058	2.53093	5.77945	0.0490564	NA
728554	LOC728554	THO complex 3 pseudogene	6.44563	2.47458	5.55804	0.00143127	0.0153893
728989	LOC728989	phosphodiesterase 4D interacting protein pseudogene	7.53935	2.9943	7.96848	0.00773514	0.0450635
389816	LRRC26	leucine rich repeat containing 26	1.40261	3.35464	10.2293	0.0312505	NA
55384	MEG3	maternally expressed 3	8.2619	2.41836	5.34565	0.00731109	0.0432784
100302211	MIR1203	microRNA 1203	2.33449	2.1352	4.39298	0.00451064	0.0317943
407020	MIR28	microRNA 28	0.854619	2.68159	6.41563	0.021266	NA
100422921	MIR3149	microRNA 3149	1.00567	2.36621	5.15584	0.0248673	NA
100500890	MIR3611	microRNA 3611	1.27963	2.26665	4.81204	0.0263122	NA
100422909	MIR4295	microRNA 4295	0.918115	2.7517	6.73509	0.0250554	NA
102465856	MIR7974	microRNA 7974	0.992319	2.28634	4.87817	0.0378008	NA
51778	MYOZ2	myozenin 2	1.35606	2.38309	5.21652	0.0301978	NA
102724730	NA	NA	1.62299	2.16562	4.4866	0.0240216	NA
100288332	NPIPA5	nuclear pore complex interacting protein family member A5	1.7775	2.0359	4.10077	0.0488979	NA
10819	OR7E14P	olfactory receptor family 7 subfamily E member 14 pseudogene	1.04545	2.94021	7.67522	0.0066292	NA
8587	OR7E2P	olfactory receptor family 7 subfamily E member 2 pseudogene	3.40144	2.23842	4.71882	0.0188045	0.0782642
56107	PCDHGA9	protocadherin gamma subfamily A, 9	1.18078	2.62815	6.18233	0.0115118	NA
9890	PLPPR4	phospholipid phosphatase related 4	0.743023	2.90942	7.51317	0.0209551	NA
100101440	PMS2P7	PMS1 homolog 2, mismatch repair system component pseudogene 7	1.00747	2.33231	5.03613	0.0462989	NA
6096	RORB	RAR related orphan receptor B	2.82574	1.99838	3.99551	0.0161395	0.0715415
7356	SCGB1A1	secretoglobin family 1A member 1	0.899452	2.70044	6.50001	0.0280824	NA
153769	SH3RF2	SH3 domain containing ring finger 2	6.09345	2.03008	4.08427	0.0311573	0.108835
283514	SIAH3	siah E3 ubiquitin protein ligase family member 3	1.24308	2.75315	6.7419	0.00813759	NA
201780	SLC10A4	solute carrier family 10 member 4	1.00278	2.31479	4.97531	0.0467404	NA
283652	SLC24A5	solute carrier family 24 member 5	1.78155	2.43693	5.41486	0.00698152	NA
100874259	SLC25A30-AS1	SLC25A30 antisense RNA 1	0.761633	2.40084	5.2811	0.0383236	NA
293	SLC25A6	solute carrier family 25 member 6	29.1817	4.74108	26.7428	0.00255471	0.0223096
11000	SLC27A3	solute carrier family 27 member 3	3.0982	3.20461	9.21902	0.0162492	0.0718396
100113378	SNORD119	small nucleolar RNA, C/D box 119	0.800759	2.43602	5.41147	0.0368547	NA
26808	SNORD42B	small nucleolar RNA, C/D box 42B	1.13047	2.06596	4.18711	0.0349231	NA
121599	SPIC	Spi-C transcription factor	2.35297	3.19168	9.13673	0.0400797	0.127838
56164	STK31	serine/threonine kinase 31	2.41753	2.10194	4.29285	0.00915653	0.0500049
101060376	TBC1D3L	TBC1 domain family member 3L	3.1616	2.73809	6.67187	0.0039401	0.0289767
7003	TEAD1	TEA domain transcription factor 1	1.72749	3.21196	9.26606	0.00935509	NA
92293	TMEM132C	transmembrane protein 132C	1.13003	2.5486	5.85065	0.0185742	NA
135932	TMEM139	transmembrane protein 139	1.92699	2.07124	4.20249	0.0114254	0.0571574
28740	TRAJ15	T cell receptor alpha joining 15	7.4244	2.00138	4.00384	2.83e-05	0.00127307
28725	TRAJ30	T cell receptor alpha joining 30	7.34989	1.99975	3.99931	8.55e-05	0.00255543
28705	TRAJ50	T cell receptor alpha joining 50	3.08393	2.04732	4.13337	0.00463113	0.0323072
28747	TRAJ8	T cell receptor alpha joining 8	5.52009	2.43152	5.39462	1.08e-05	0.000673904
28685	TRAV8-1	T cell receptor alpha variable 8-1	21.5075	2.43207	5.39667	0.00021969	0.0045872
28638	TRBC2	T cell receptor beta constant 2	33.5811	2.37117	5.1736	7.56e-06	0.000533346
28632	TRBJ1-4	T cell receptor beta joining 1-4	2.70894	2.14872	4.43435	0.00434524	0.0309676
28517	TRDV2	T cell receptor delta variable 2	20.0653	2.67269	6.37618	1.37e-05	0.000777265
100189163	TRG-GCC2-5	tRNA-Gly (anticodon GCC) 2-5	0.924965	2.69882	6.4927	0.0316915	NA
114043	TSPEAR-AS2	TSPEAR antisense RNA 2	2.5906	2.69342	6.46847	0.00328875	0.0260331
375690	WASH5P	WASP family homolog 5, pseudogene	3.23555	3.3284	10.0449	0.00021887	0.00458434
440253	WHAMMP2	WHAMM pseudogene 2	2.17792	2.42507	5.37054	0.0189923	0.0786074
79698	ZMAT4	zinc finger matrin-type 4	2.36734	2.44664	5.45145	0.0346297	0.116762
